# Supplementary material for: Carbon ion radiotherapy of hepatocellular carcinoma provides excellent local control: The prospective phase I PROMETHEUS trial
Source: PubMed Central journal article supplement (PMC11087711; doi:10.1016/j.jhepr.2024.101063), 2024-03-11
Supplement: mmc1.pdf [file mmc1.pdf]

**Carbon ion radiotherapy of hepatocellular carcinoma provides excellent local control: The prospective phase I PROMETHEUS trial**

Philipp Hoegen-Saßmannshausen, Patrick Naumann, Paula Hoffmeister-Wittmann, Semi Ben Harrabi, Katharina Seidensaal, Fabian Weykamp, Thomas Mielke, Malte Ellerbrock, Daniel Habermehl, Christoph Springfeld, Michael T. Dill, Thomas Longerich, Peter Schirmacher, Arianeb Mehrabi, De-Hua Chang, Juliane Hörner-Rieber, Oliver Jäkel, Thomas Haberer, Stephanie E. Combs, Jürgen Debus, Klaus Herfarth, Jakob Liermann

Table of contents

Table S1.....2

Table S1: Mean and median doses for gross tumor volume (GTV) and planning target volume (PTV) in all patients

| Patient Nr. | GTV mean dose | GTV median dose | PTV mean dose | PTV median dose |
|-------------|---------------|-----------------|---------------|-----------------|
| 1           | 32.4          | 32.4            | 32.3          | 32.4            |
| 2           | 32.4          | 32.4            | 32.2          | 32.4            |
| 3           | 32.5          | 32.5            | 31.7          | 32.3            |
| 4           | 34.1          | 34.1            | 33.4          | 34.0            |
| 5           | 35.2          | 35.2            | 34.7          | 35.0            |
| 6           | 35.2          | 35.2            | 34.7          | 35.0            |
| 7           | 38.0          | 38.0            | 37.6          | 37.9            |
| 8           | 38.0          | 38.0            | 37.7          | 37.9            |
| 9           | 38.1          | 38.1            | 37.7          | 37.9            |
| 10          | 40.1          | 40.1            | 39.7          | 39.9            |
| 11          | 40.1          | 40.1            | 39.6          | 39.8            |
| 12          | 38.1          | 38.1            | 37.4          | 37.8            |
| 13          | 39.9          | 39.9            | 39.1          | 39.7            |
| 14          | 42.0          | 42.0            | 41.4          | 41.8            |
| 15          | 42.1          | 42.1            | 41.5          | 41.8            |
| 16          | 42.0          | 42.0            | 41.5          | 41.9            |
| 17          | 41.9          | 41.9            | 41.8          | 41.9            |
| 18          | 41.9          | 41.9            | 41.8          | 42.0            |
| 19          | 42.5          | 42.5            | 42.1          | 42.1            |
| 20          | 42.4          | 42.4            | 41.9          | 42.0            |
